# Supplementary material for: Thermal stability of photoluminescence in Cu-doped Zn–In–S quantum dots for light-emitting diodes
Source: Royal Society of Chemistry journal article supplement (doi:10.1039/c6cp00240d), 2016-01-01
Supplement: c6cp00240d1.pdf [file c6cp00240d1.pdf]

## Electronic Supplementary Information

### Thermal stability of photoluminescence in Cu-doped Zn-In-S quantum dots for light-emitting diodes

Xi Yuan<sup>a</sup>, Ruixin Ma<sup>a</sup>, Jie Hua<sup>a</sup>, Yang Liu<sup>a</sup>, Ji Li<sup>a</sup>, Wenjin Zhang<sup>b</sup>, Jialong Zhao<sup>\*a</sup> and Haibo Li<sup>\*a</sup>

<sup>a</sup> Key Laboratory of Functional Materials Physics and Chemistry of the Ministry of Education, Jilin Normal University, Siping 136000, China.

<sup>b</sup> Xingzi New Material Technology Development Co., Ltd., Shanghai 200333, China

E-mail: [zhaojl@ciomp.ac.cn](mailto:zhaojl@ciomp.ac.cn) (JL Zhao); [lihaibo@jlnu.edu.cn](mailto:lihaibo@jlnu.edu.cn) (HB Li)

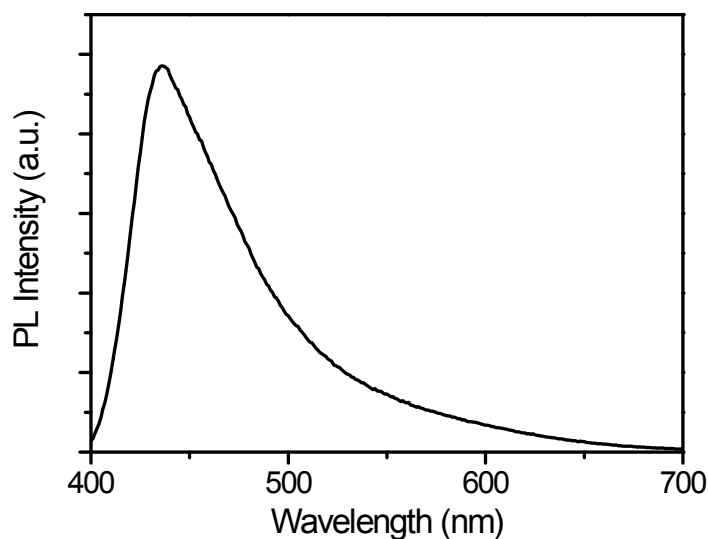

Fig. S1 PL spectrum of undoped Zn-In-S QDs in chloroform with Zn/In precursor molar ratio of 1/1.

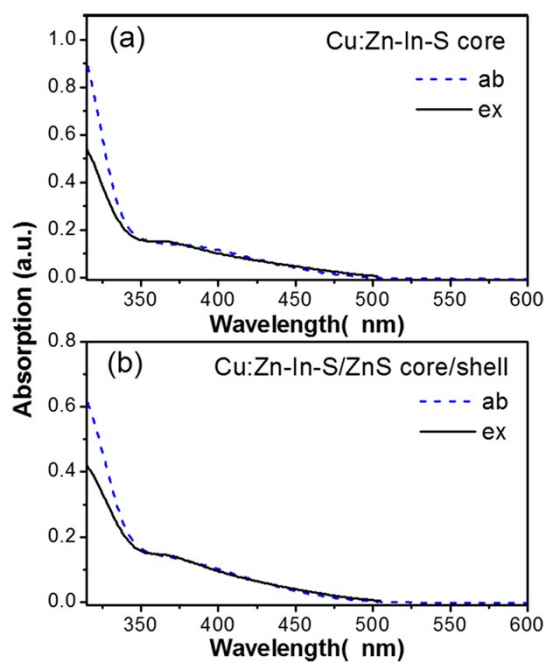

Fig. S2 UV-visible (blue dashed lines) absorption and PL excitation spectra (black solid lines) of Cu:Zn-In-S core (a) and Cu:Zn-In-S/ZnS core/shell (b) QDs with Zn/In ratios of 1/1.

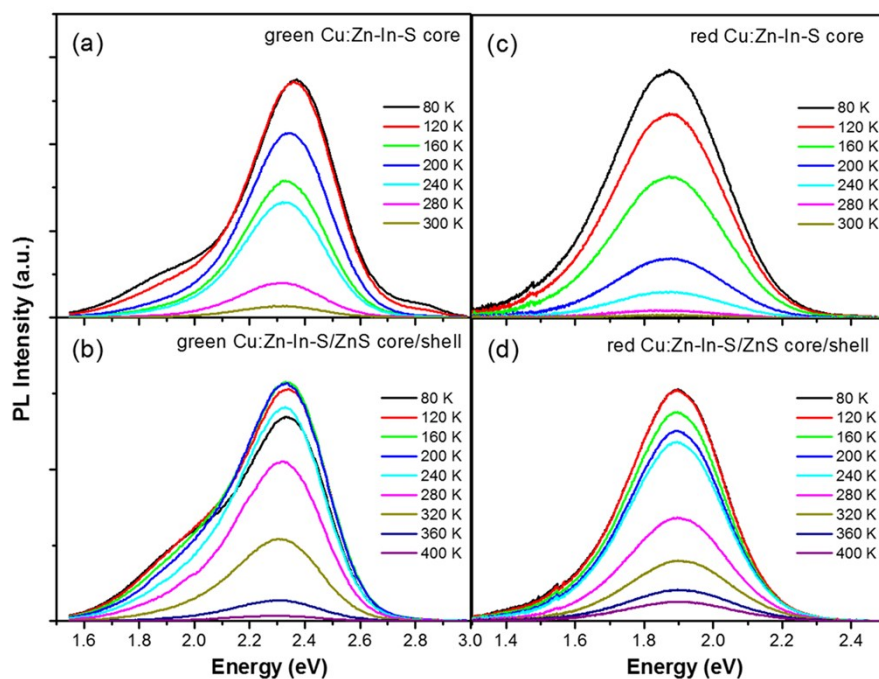

Fig. S3 PL spectra of Cu:Zn-In-S core (a, c) and Cu:Zn-In-S/ZnS core/shell (b, d) QDs with Zn/In ratios of 1/1 (a, b) and 1/4 (c, d) at different temperature from 80 to 400 K. The excitation wavelength is 405 nm.

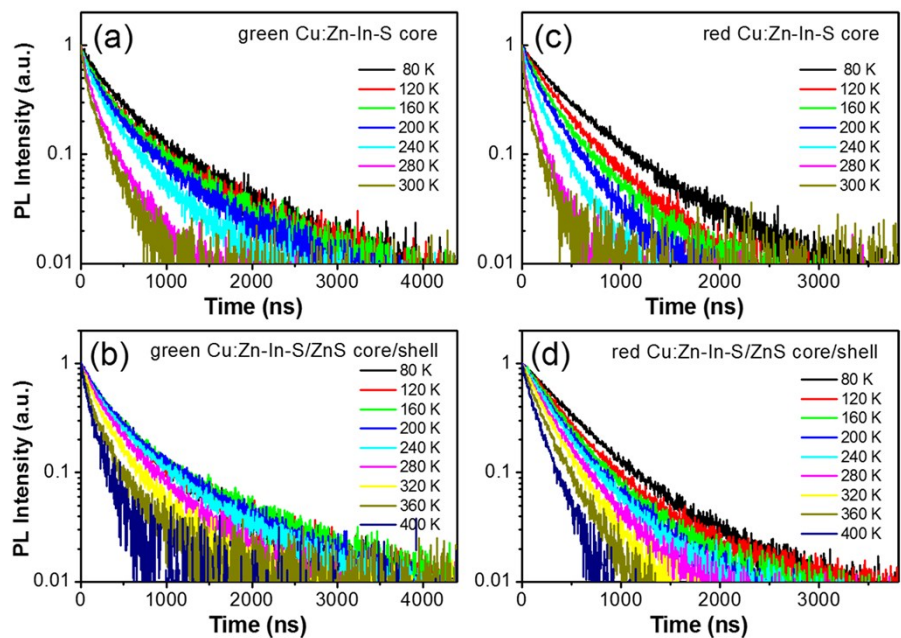

Fig. S4 The temperature-dependent decay curves of Cu:Zn-In-S core (a, c) and Cu:Zn-In-S/ZnS core/shell (b, d) QDs with Zn/In ratios of 1/1 (a, b) and 1/4 (c, d). The excitation wavelength is 405 nm.
